# Supplementary material for: Comparative analysis of microRNA expression profiles of adult Schistosoma japonicum isolated from water buffalo and yellow cattle
Source: Parasit Vectors. 2019 May 2;12:196. doi: 10.1186/s13071-019-3450-7 (PMC6498558; doi:10.1186/s13071-019-3450-7)
Supplement: Supplementary file 2 — Additional file 2: Table S1. The information related to the precursor miRNAs of predicted miRNAs. [file 13071_2019_3450_MOESM2_ESM.xlsx]

## Sheet: Sheet1
Table S1.The information related to the precursor miRNAs of predicted miRNAs
name	location at genome	score for MFE	score for randfold	total read count	mature read count	pri_seq	pri_size(nt)	pri_G+C%	pri_struct
SJC_S000996_20012	20012	-26.9	-2.2	91	91	ugauuaucguacaaauauaaacucuuuucuguagaaacagauauagaauuucguauugaucauaaccuacucagcauuacauuuguauuuacucagaaaguuugucgg	108	29.6296	................(((((((.((((..(((((.((((((.(((......(((............)))......))).)))))).)))))..)))))))))))...
SJC_S006036_37578	37578	-21	-2.2	8	8	uuuguauauagacaauuugauuccaauuauuaucccuauuaauccauaauauguucucuuauacuaaaacauuaauagaugauauauuuauuaucagauuuucaacug	108	21.2963	..........((.((((((((.........((((.((((((((...((.((((......)))).))....))))))))..))))........)))))))).)).....
SJC_S000587_13351	13351	-4.4	-2.2	106	101	gggaaguuggcaccacuguuaugcugguugucuggggaaaacaccuuacugccaucacaccucuuuacagccugcaguacgacuucguccuugaaccuuauauuuguu	108	47.2222	(((((((((............(((.((((((..((((......................))))...)))))).)))...)))))))..))..................
SJC_S000400_19068	19068	-4.6	-2.2	3	3	uguuuguguuucacgcuuauuaaugucaacuaauuugggaucuggaagagcugaucuuauuccaauguuauugaaguaaguuguaaucuaaucuuagaggcacaucgu	108	34.2593	....(((((((((((((((((....((((.(((((((((((..(((........))).))))))).)))))))))))))).)))............))))))))....
SJC_S000361_21508	21508	-16	-2.2	64	64	ugacuaucaacuaaccgcuuaucuguauguuuauauucaguuaaugaaguacauguacuacuauuauaugguucacuguaauaguccauuucagauaaauuaacauga	108	28.7037	..................(((((((.(((....((((((((....(((...((((((.......)))))).))))))).))))...)))..)))))))..........
SJC_S000038_15779	15779	-1.7	1.6	30	30	agacuccuaagauugaagucauucaaauccagagacccacuuuauuuguaguuuuuaaucuuuccaacgaaaagacagcagacuguaaguuuagugauagucucuaau	108	34.2593	.((((.(.......).))))..........((((((.((((..(((((((((((....(((((.......)))))....)))))))))))..))))...))))))...
SJC_S000127_16029	16029	-6.3	1.6	287	287	ucccggguaacuacuacaauauugucacgugcagcucugacuuaaauacuacauuguacagauguucaauuacaauacuuaguaguccgcgccacaugauaaaauaaa	108	37.037	....((((.(((((((...((((((....((.(((((((((..............)).)))).)))))...))))))..)))))))..)).))...............
SJC_S000310_25277	25277	-10.9	-2.2	90	90	uacuguuucuuucgcucaggagaauauaauugagacuucuucuguuacaaucugguuucugcucucaaauuuaacaggucauacugagucguuaaauaucuucuguag	108	35.1852	..............(((((((((.(((..(((((((((..(((((((.(((.(((........).)).)))))))))).......))))).)))))))))))))).))
SJC_S000310_25278	25278	-5.5	-2.2	90	90	ucugguuucugcucucaaauuuaacaggucauacugagucguuaaauaucuucuguagucuuuuuaauguuuguaagcucuuuuaaugauauucgaucauugaaagua	108	30.5556	..........(((..(((((((((.(((.(.(((.(((............))).)))).))).)))).)))))..))).(((((((((((.....)))))))))))..
SJC_S000218_13093	13093	-6	1.6	20	20	uuuuauuuaauuuuaauuuaugcaucaaauaauuaugaucuacaugguguauauaaacaauuauauguacgucaauuauuagaugcauguuauauuauuucaucuggu	108	20.3704	..................((((((((.((((((..((((.((((((.(((......)))....)))))).)))))))))).))))))))...................
SJC_S000729_25440	25440	-10.3	-2.2	58	57	aacacaguuuucuauuaugcuacguagaugauauaaacaauaaccgaucugauuaaucuauacuugacguuuaaccuauuccaucaucauaauuauguagcguuagacu	109	30.2752	..........((((..((((((((((((((((........(((.((.((................)))).))).........)))))).....))))))))))))))..
SJC_S000729_25439	25439	-3.6	1.6	57	57	uucaugaucgauuuauacuacuuuauauuauauaguagcuuacaucguggaacacaguuuucuauuaugcuacguagaugauauaaacaauaaccgaucugauuaaucu	109	28.4404	.(((.(((((..((((.....((((((((((...(((((.((....((((((.......)))))))).)))))....))))))))))..)))).)))))))).......
SJC_S000428_27179	27179	-23.3	-2.2	51	51	uuaaagcuucgaaggucucuucugccauauauguauggucuacuuacaauguuuaaagaaaauacuucaccuaggucuauaauaucaaugauaaugucaccucaacac	108	33.3333	..........((((.....((((...((((.((((.(.....).))))))))....))))....))))....((((..(((.((((...)))).))).))))......
SJC_S000429_14174	14174	-2.1	-2.2	20	20	gauuugacacuugucaugaaacuuaguaaguuguagauucgaucauuauugaggauuugcauacuagaaugaaagaguuaacgaguagcuaaugaguuucaguggucgu	109	34.8624	....((((....))))(((((((((((.(.((((.(((((..(((((....((..........))..)))))..))))).)))).).)))...))))))))........
SJC_S000429_14173	14173	-7.8	-2.2	20	20	auuacggauuuagcaauauagaccauuucacaauggcucggugguuuaaagauuugacacuugucaugaaacuuaguaaguuguagauucgaucauuauugaggauuug	109	33.945	....((((((((.((((.((.....(((((...((((..((((..............)))).))))))))).....)).)))))))))))).(((....))).......
SJC_S001033_16528	16528	-14.8	-2.2	208	208	uacguuuacucaugauugcugucagacuauucguuuugguacuacuucuaagagaauuaagcuuuuuguuucucucaucucuaucaaaugacauucuaacagauucua	108	32.4074	..................((((.(((....((((((.((((.........((((((.(((.....))).))))))......))))))))))...))).))))......
SJC_S000690_19213	19213	-7.3	-2.2	660	660	ucuguuuccaauaagauguagguggauguuuaauagcacgauuagaguauaaacacguccagaucgagcgagccucuccaacgaugacuguuggugauauugucaguugagu	112	41.9643	..((((.((((((...(((.((.(((.((((....((.(((((.((((......)).))..))))).)))))).))))).))).....)))))).)))).............
SJC_S000900_14705	14705	-20.6	-2.2	4864	4864	aguuagugcauaaacggcgaauuccacuuauugugcaaaauacgaugauaguaaaugauacuuuaauacaauaaugauuacaacuguuguuacagcuaaugccaccua	108	32.4074	.((...(((((((..((.(.....).))..)))))))....))(((((((((...((((.(.(((......))).)))))..)))))))))...((....))......
SJC_S000083_4029	4029	-3.8	-2.2	168	168	gaggucagcagaaucaaagcaaacuuaaaggaauugaucaguagguccuacuguucguagucacuguauugguucgaaguagauugcaucaguaauuugaucaacugu	108	38.8889	.......((((.((((((((((.((.....((((((((((((.((..((((.....)))))))))).)))))))).....)).))))........))))))...))))
SJC_S001656_33149	33149	-32	-2.2	154	154	uuugcaacaaaaucugauacccuucugucaaacuuaauuaggguuauuuccuuuuuuuaaaaaacuacaucagaaagcuacaaaccucuugauuauugacuuucaaaa	108	28.7037	..........................(((((...(((((((((((.....((((((...............)))))).....)))))..)))))))))))........
SJC_S000368_16699	16699	-1.4	1.6	192	192	ggaauccuaccacugggcgcaagcacaaugguauggaggguagugucauuugacugagugguuauaaagaaacucuaguuaauaaugauaauaacaauaauauuggau	108	37.037	....((((((((.((.((....)).)).))))).)))......((((((((((((((((............)))).)))))..)))))))..................
SJC_S000136_11873	11873	-4.2	-2.2	234	234	augauacuuaaaaguauggucagauguuacuuuaguucauaacaaugaaaugguaacuguaauugauugaauacgucacggauugguacugacaggguaccauuaaaaa	109	32.1101	...(((((....)))))((((((..((((((....(((((....)))))..)))))).....))))))...............(((((((.....))))))).......
SJC_S002121_37253	37253	-21.7	-2.2	176	170	gaacaacucuuuccaagaacgaaaucuacgcucugaaauaacuacguaaggaaaaaauaauuauuaucaugagggcagauaaagggaauacuacgguaguaaugaacaccu	111	35.1351	......((((((...........((((.(.(((((((((((...................))))).))).))).).))))))))))........(((.((.....))))).
SJC_S000059_1898	1898	-11.4	-2.2	1843	1843	aucaguuacgacugguauacaggauuuuuuaaaggauaccuuauuucugacuauauuuaugaauugauuauacuuuaugugaugucuaguaauggaauuuugugcagc	108	29.6296	((((((....)))))).((((((((((((((..(((((..((((....((.((((.(((.....))).)))).))...)))))))))..))).)))))))))))....
SJC_S000045_2359	2359	-24.2	-2.2	760	760	aauauguuaaauguauacuuagauuaccguuugauuauuauguuacguaauaauuucuuuaaguaauuaaauguuugauuuaaaaauaauuaaguaguuuguacuuua	108	17.5926	..................((((((((.((((((((((((......................))))))))))))..))))))))........(((((.....)))))..
SJC_S000254_14120	14120	-40.2	-2.2	158	158	aacaaaaacguauuaagugauuaccacagggauaacagugacguucagaacacagaucucaugaaacaaacaccgaguauaucuucaguaacauuucagcuaaguaaa	108	35.1852	..............(((((.((((....((((((((.(((...((((((.........)).)))).....)))...)).))))))..)))))))))............
SJC_S000061_3822	3822	-15.4	-2.2	202	202	guaacaauuauuacuacagaggauaauugagaugagaaaugaaaaaaaaaguuauuucaugaaauuauccaguuccaucgccacaugauuuguuucauauaaugcuuc	108	28.7037	(.(((((((((.......(((((..((((.(((((...((((((..........))))))....)))))))))))).)).....)))).))))).)............
SJC_S001159_23624	23624	-5.8	-2.2	48	48	ugagucgacaguugagauccugcuaagacacuguagacguugaaugcaccguuuuaauguaaaugccucaguggacugcguuacucaauucuuuaagucuaagcaauuac	110	40.9091	......((((((((((....(((.....(((((.((((((((((........))))))))......)))))))....)))...)))))))......)))...........
SJC_S001294_18900	18900	-21	-2.2	29	29	guuugaucauauuguaguaaguaauaccuaguuuauacaugcacuaaaacagguaacugcuuaauagcuuaacaauacacuuuuagaugaaauguuuuaacagaagac	108	28.7037	((((((...((((((((((((((.(((((.((((............)))))))))..)))))....)))..)))))).....))))))....................
SJC_S027210_41852	41852	-6.2	-2.2	259	259	gccaagugccgaagacagcuuuuaguaaugacgaagucgaaauaugcacagugacacugucaaaucagccgacugaaagcuaugacuaagcgaauuaccggaguugaga	109	44.9541	...............(((((((..(((((..((.((((...(((.((.((((....(((......)))...))))...)))))))))...)).))))).)))))))...
SJC_S000207_11841	11841	-20.6	-2.2	50	48	ucauagccugugauguuauuacugaaaugauuaugaggauucugacuuuauuaaugagucaacccgcuguuauuauuuuuuccauuacuuuaucaaauaacuuuuauug	109	28.4404	.........((((((........((((((((....((.....((((((.......)))))).....))...))))))))...)))))).....................
SJC_S005867_39540	39540	-5.6	1.6	55	55	ggaccuucauuuaaucgucguuucucuucauaaucaauuaaauugaauaguucugaaaauguuucaugauauccauuuugaagaauaaugaugaauaaauuuucguga	108	26.8519	........(((((.((((((((..((((((.(((..((.....((((..(((.....)))..))))....))..))).))))))..)))))))).)))))........
SJC_S027444_42441	42441	-6.6	-2.2	151	151	aagcauucucguuaauugugguagaauggcgaacacuuagggaaacuuuauuaccacuaauuguauuguaauuugugucagaaaugguagucuuaucuggagugcuggua	110	36.3636	.((((((((.(.(((((.(((..((((.(((((((.((((((...........)).)))).))).)))).))))...))).)).........))).).))))))))....
SJC_S000031_504	504	-34.4	-2.2	298	298	cguauucuuaauauuauugauuuaauugcuauauuaccauuuuauauucauguauuauuaauugaaguaguuacacgacaucauaaugaaucauugcauucauuaagaa	109	22.0183	......................((((((((..((((..((..((((....))))..))))))...)))))))).......((.((((((((......)))))))).)).
SJC_S000427_25203	25203	-2.4	-2.2	319	318	acaagugugaccaucuugauucaguggccuagugaugaacgcggugguguuuagcaccaaacgaacugaguuugaauuccuaugugaacaucaaaaucggaugcaugugca	111	44.1441	.((((((....)).))))(((((((......(((.(((((((....))))))).))).......))))))).........((((((..((((.......))))))))))..
SJC_S000208_6255	6255	-14.6	-2.2	278	278	aaaacaccauuugaauucaaauuaucugcguuacauuuauguuuaguauauaaaguauaauuaucagaagaagguaauucaguuggccaauuuaaucuaugcaauaau	108	25	......(((.(((((((....((.((((.((((..(((((((.....)))))))...))))...)))).))....))))))).)))......................
SJC_S000033_2878	2878	-22.1	-2.2	46	46	aauuaaaccuaacaucauaucauauauugguuuuauucaagcuuguuaguuaaacuuuaauuauaauauaugaucacaugugcucaucuaacucaagaauuauuucac	108	24.0741	...........((((...(((((((((((...(((....((((....))))......)))...)))))))))))...))))...............(((....)))..
SJC_S008431_38534	38534	-20.6	-2.2	10	10	auuaaaguacuugugauugcaauuucauaauguuuauuacuauuacaaaguagcauuagcauaguauguaugauauucauuaccaauuuagauaaauaauuauuuugc	108	22.2222	..(((((((.((((.(((..((((...(((((..(((((....((((.(.((((....)).)).).)))))))))..)))))..))))..)))..)))).))))))).
SJC_S000109_5262	5262	-8.6	-2.2	173	172	uuuaccaaugaagaaggauaauugaauugaaguggauuuauagagauugauauuacguuaagguguuugaauuuauuacagaucgaugaugguugaaugucauugaaa	108	28.7037	.....((((((..((.....(((((.(((.((((((((((.(.(..(((((.....)))))..).).)))))))))).))).))))).....)).....))))))...
SJC_S001712_29112	29112	-9.4	-2.2	1785	1785	uucuaguacugcgaacuuugaugcuguugguuuuguuuucaauacauaucuucauacgcuaagaauguccugacugagcgauuacuggaguuucgaauacuauuaugauucuu	113	35.3982	...(((((........(((((.(((.(((((.(((((((((..((((.((((........))))))))..)))..))))))..)))))))).))))))))))...........
SJC_S000823_13908	13908	-40.9	-2.2	306	306	guugaauauuaauuucacguuguuguuuaucuucuuguguacuguuuaauguaaauuguggauuuucacuuauucuuaauucuucugaaaccgcuguaccacgcucca	108	32.4074	(.((((((.((((.....)))).)))))).)....(((((((.((((......(((((.((((........)))).)))))......))))....))).)))).....
SJC_S000484_10680	10680	-8.3	-2.2	22116	21983	uaacaagcauguuagguauguggagugaugugacaccucuugaaugauuugugauuacauucuuugucugauuuuguaaaugcuguuuagcgaauuuaaacgugucuc	108	35.1852	.....(((((...((((..((((((.((((((((((.((......))...))).)))))))))))).)..)))).....)))))((((((.....)))))).......
SJC_S000484_10680	10680	-8.3	-2.2	22116	21983	uaacaagcauguuagguauguggagugaugugacaccucuugaaugauuugugauuacauucuuugucugauuuuguaaaugcuguuuagcgaauuuaaacgugucuc	108	35.1852	.....(((((...((((..((((((.((((((((((.((......))...))).)))))))))))).)..)))).....)))))((((((.....)))))).......
SJC_S005013_35628	35628	-9.9	-2.2	55748	55748	augguaagcaaguaaauaauaaucauuuaaaucuuaaaaauguauaaaauaaauauauuccagagaaacuuggaagacuugugauuuaguuguuuaaugucgaaauacaaguaa	114	22.807	....(((((((.(((((.((((((.(((((.((((...(((((((.......)))))))...))))...))))).)).)))).))))).)))))))..................
SJC_S005013_35627	35627	-1.9	1.6	55785	55748	aaauauauuccagagaaacuuggaagacuugugauuuaguuguuuaaugucgaaauacaaguaaaacauugucauaucuaaaugaacaacaaucacaaaucuccaugugaaauc	114	28.9474	.................((.((((.((.((((((((..((((((((.....((.((((((........)))).)).))....)))))))))))))))).)))))).))......
SJC_S005013_35627	35627	-1.9	1.6	55785	55748	aaauauauuccagagaaacuuggaagacuugugauuuaguuguuuaaugucgaaauacaaguaaaacauugucauaucuaaaugaacaacaaucacaaaucuccaugugaaauc	114	28.9474	.................((.((((.((.((((((((..((((((((.....((.((((((........)))).)).))....)))))))))))))))).)))))).))......
SJC_S000484_10690	10690	-17.2	-2.2	22209	21983	uaacaagcauguuagguauguggagugaugugacaccucuugaaugauuuaugauuacauucuuugucugauuuuguaaaugcuguuuagcgaauuuaaacgugucuc	108	34.2593	.....(((((...((((..((((((.(((((((((..((......))....)).)))))))))))).)..)))).....)))))((((((.....)))))).......
SJC_S024075_47417	47417	-8.6	-2.2	4913	4365	cucugugggcguggguucgaaucccacuccugacaccagacuuaugcacacgaacuugcacacacgucaccucuacauuugaacacacacauacacaaugacaacaac	108	49.0741	...((((((.(((((.......))))).))).)))...(((...((((........)))).....)))........................................
SJC_S000162_8913	8913	-0.1	-2.2	378	373	guacuccagaaagauuggcaaucuucuaucgagccucuucaacggugacuaauggcgauauggucuguuggaguccaccauugaguagagucagaaggucgcuauguuaga	111	45.9459	...............((((.(((((((...((..((.(((((.(((((((...(((......)))......))).)))).))))).))..))))))))).)))).......
SJC_S011080_46224	46224	-34.4	-2.2	300	300	ugcccacucaaucucacgcacggaauaagaacacaagccgaugaaucaaucaggcaaaccauacuguauuucaagcacccuguuaaucuaugcauauaaccugaccauga	110	42.7273	.................((..((((((((.......((((((......))).)))........)).))))))..))....(((........)))................
SJC_S003818_36920	36920	-19.5	-2.2	97	97	auuucccuaccucuguauauuaugauuuuuguauaugucuaugaguuugaguguaagugaaauaugcauaccaaauauaugaagcuaccagcauauuaauguaccauu	108	29.6296	..............((((((((..((.((.(((....((.(((.(((((.((((..(((...)))..))))))))).)))))...))).)).))..))))))))....
SJC_S000809_10483	10483	-8	-2.2	69	69	cauucauuugcuuagugcaguagacuguauaaacaaucgacaaaacaaaguguuuuauuauuauuguuguuaugguuacucauugacucuacuuuguuuauguacaug	108	29.6296	...........((((((.(((.(((((((..((((((.((.((((((...)))))).))...))))))..))))))))))))))))........(((......)))..
SJC_S002541_36365	36365	-16.3	-2.2	10498	2479	acaaagaaguguaacaaacuuucagaacuguauuugcgaacacuauuucauuuauucgaacugucuguaauguaaacauuuuguuucuauuauuguuacgcuccgcuu	108	31.4815	.......((((((((((.....(((((.(((..(((((.(((....(((........))).))).))))).....)))))))).........))))))))))......
SJC_S002541_36363	36363	-32	-2.2	10135	2479	acaaagaaguguaacaaacuuucagaacuguauuugcgaacacuauuucauuuauucgaacugucuguaauguaaacauuuuguuucuauuauuguuacucuccgcuu	108	30.5556	.......((.(((((((.....(((((.(((..(((((.(((....(((........))).))).))))).....)))))))).........))))))).))......
SJC_S002541_36363	36363	-32	-2.2	10135	2479	acaaagaaguguaacaaacuuucagaacuguauuugcgaacacuauuucauuuauucgaacugucuguaauguaaacauuuuguuucuauuauuguuacucuccgcuu	108	30.5556	.......((.(((((((.....(((((.(((..(((((.(((....(((........))).))).))))).....)))))))).........))))))).))......
SJC_S003818_36919	36919	-15.7	-2.2	98	97	uuaauaugccaaucaugauacaaaguggacaaacaagaagauuuauguugauuucccuaccucuguauauuaugauuuuuguauaugucuaugaguuugaguguaagu	108	29.6296	...((((((.((((((((((((..((((..((((((.(.......).))).)))..))))...))))..))))))))...))))))......................
SJC_S000023_4100	4100	-16.3	-2.2	123	123	ggcuaugucuaauggcauaacguuugaucuaugauguuagaaauuuguuuuuccuaauaauuucauucauucugagcugcauuuauagucaucacacuuauuaguuuu	108	29.6296	(((((((...((((.((....((((((...(((((((((((((......))).))))))...))))....)).)))))))))))))))))..................
SJC_S000315_9203	9203	-15.1	-2.2	116	116	cuaguguauggaaaaaauuauuacauaagcccacuaguaauaggaguuacacauauuauuauuagauuuauauuuauucuauuuguggcaucaaucaaucguggagcau	109	28.4404	...(((((.............)))))..((((((........((.((((((.(((..((...((......))...))..))).)))))).))........)))).))..
SJC_S000122_9478	9478	1.1	1.6	107	107	cuccaaguuggaaucgcauuguguuagcagaaguuucaagcugagcauugacuugaauuuaucaaaugaugcuugacauucugcugacuaaugccaggcuuugucuuuccu	111	40.5405	.((((...))))...((((((.((((((((((...((((((....((((...............))))..))))))..)))))))))))))))).((((...)))).....
SJC_S000383_5932	5932	-30.4	-2.2	139	139	auuuuuauauuauaaguagugauuuauuaaauauuaucaauuuagaaaagaagaaaaaaaaaugcacauuugauuuguuauagugugaaauugauuagucucuauugcua	110	19.0909	..............(((((.((((.(((((((((((((((.(((((......................))))).)))..)))))))....))))).)))).)))))....
SJC_S001313_30555	30555	-7.2	-2.2	47	46	cuauucuguacaacaggccuaaaugaauuacaagacucauuguggauuguuuugaaaccuacugauuuugaauuuuguuuauucggcggcuuauauuaccagccuggca	109	36.6972	.....((((...))))(((((((((((...(((((.(((..((((.((.......)).))))))))))))...))))))))...)))((((.........)))).....
SJC_S000172_7087	7087	-9.7	-2.2	2675	2675	uagaguuggagcucucagcaaugaauaucauacuguacuaaacacguaaaauagacaauuaaaagcuauuuuugguagugaauugaacauauucaauuguaauucaaca	109	29.3578	.(((((....)))))..(((((((((((.......(((((..((...(((((((.(........)))))))))).)))))........)))))).))))).........
SJC_S000351_33128	33128	-1.4	-2.2	728	657	uaguacccauucacgugaagucggggcauaaugagguuacgggcuaugccuucuuagacaaugguucguauguuaacuugauaagagcugacuguguggaacuucuaggg	110	45.4545	.....(((.((((((...((((((......((.(((((((((((((((.((....)).).)))))))))).....)))).)).....)))))).)))))).......)))
SJC_S003541_38664	38664	-32	-2.2	31	27	aaucauauuagauuucaagcauuuucuuuacguauguauaaaccaguccacacagugaacccauuagaaaauuaauaucaaugcaaaacgagggagacagugguaguga	109	33.945	((((......))))(((..((((.(((((.(((.(((((..............((((....))))...............)))))..)))..))))).))))....)))
SJC_S000170_15586	15586	-12.8	-2.2	62	62	auaaauucagacuaugcagaagcucauuuggaauaaugacaucaauacaaaucaaagauuuuaaugggagucaaugguauagucaauuagcucuaguucauaugaaaa	108	29.6296	.........((((((((....((((..(((((((..(((............)))...)))))))...)))).....))))))))........................
SJC_S000395_16293	16293	-9.7	-2.2	4812	4060	aagccaaguacuaccagaaccuuauugaagaacuguaaugguaaccaaacguccagacgccuggcgcugaagauacaacuagauaggcuucaaaauaagaacuaauugggc	111	42.3423	.............((((...((((((((((..((((....(((......((.((((....)))))).......)))......)))).)))))..)))))......))))..
SJC_S000423_13736	13736	-9.7	-2.2	780	776	ucggacaacuaaagaaaaguaacaaacuuucagaacuuuauuuuggaggacuauuucaauuauuuugguuuugaguaguguaaauauuucauuucuaucauuguuucgu	109	27.5229	.(((((((....(((((((((....((((((((((((.....((((((.....)))))).......))))))))).))).....))))...)))))....))).)))).
SJC_S000685_18332	18332	-19.2	-2.2	911	909	caauaaugacaaucuuuuagcguaauagacuucuccaugacuuugagugcuguucuauccucagucgauagaccuuuaucguuaaacugacuuuccucuaacgggucuag	110	39.0909	...............(((((((..(((((..(((...(((((..(((............))))))))..)))..))))))))))))..(((((.........)))))...
SJC_S004484_30279	30279	1.5	1.6	39315	39312	uucugauagagagagcacuuuuaugacggagacgaauauuaucuucgaauuuuauuuugaaguuccauaaugucauggaguugcucucuauaucagguuaauugaagc	108	34.2593	.(((((((.((((((((.((((((((((.....(((......(((((((......)))))))))).....)))))))))).)))))))).)))))))...........
SJC_S004484_30279	30279	1.5	1.6	39315	39312	uucugauagagagagcacuuuuaugacggagacgaauauuaucuucgaauuuuauuuugaaguuccauaaugucauggaguugcucucuauaucagguuaauugaagc	108	34.2593	.(((((((.((((((((.((((((((((.....(((......(((((((......)))))))))).....)))))))))).)))))))).)))))))...........
SJC_S000624_20570	20570	-14.8	-2.2	92	92	auaguaaucacaaacaaaaccugacuuaaaaugauuaaagcugaauuaugucuggggaaauugauccagaauacacacuuuucguauuuaaaacucgucagcugaaug	108	32.4074	....................((((((((((((((..((((.((...(((.((((((........)))))))))..)))))))))).))))).....))))).......
SJC_S011863_43992	43992	-11.6	-2.2	7368	4402	caccuuuauucucaggaauguuuuaauuaagaauaaacucagacugaagucuguacaacgucgcuuuacucuucguauucuuaagacugauugugcucuggacuauaaaa	110	34.5455	....(((((((.((((...(((....(((((((((.....(((.((((((.(((...)))..)))))).)))...)))))))))....)))....).)))))..))))).
SJC_S000192_2978	2978	-7.2	-2.2	2175	2173	uauacuaaaauugaaacaauacagagaagguuaguguggccccuguucaugggugacacacaaaaucaugaagcguuccauauuuuuuccgagcauugcugcuacccu	108	40.7407	............((((.((((..(.(((.(((.((((.((((........)))).))))............))).)))).)))).))))..((((....)))).....
SJC_S001393_30521	30521	-17.2	-2.2	200	200	uuucacuuaucgaagaauaacaaguagucaguucuuucuucagccaaaaacauuuacuacaaguaauuacuugcacaaacgugacuggcccuauuccaaauuguaaauu	109	33.0275	...........((((((.(((.........)))..)))))).((((...((.(((....(((((....)))))...))).))...))))....................
SJC_S001004_23121	23121	-1.4	-2.2	325	183	uagagaacagcugacagaugaauuuuuauuggggacuggagucggacaaggcugacuacucucgccuuuccucuuccuucuaauaguugauuggaucaugcaaaccucca	110	44.5455	..(((....((((((.(((.(((...((((((((...((((..(((.(((((.((......))))))))))..))))))))))))))).))).).))).))....)))..
SJC_S000114_2430	2430	-7.5	-2.2	554	554	aauugcuagacuaacugcaaagaacugucugauccucuaaauguuaaauauguuaaaagaauuaucaacgugugugaauuaaugugagaaaaucggaggggagacaag	108	34.2593	..((((.((.....))))))....((.((((((..(((..((((((((((((((............))))))).....))))))).)))..)))))).))........
SJC_S005195_40262	40262	0.9	1.6	1349	1340	auguuaaugauucuaacauuuggcgcuuaguagaaugucaccguuaacaaugaaaacauaaugguagcauuuacuaagagcucaaauguauguugucuuaaacaucgauuu	111	31.5315	(((((...(((....(((((((((.(((((((((.(((.(((((((............))))))).)))))))))))).)).))))))).....)))...)))))......
SJC_S005195_40262	40262	0.9	1.6	1349	1340	auguuaaugauucuaacauuuggcgcuuaguagaaugucaccguuaacaaugaaaacauaaugguagcauuuacuaagagcucaaauguauguugucuuaaacaucgauuu	111	31.5315	(((((...(((....(((((((((.(((((((((.(((.(((((((............))))))).)))))))))))).)).))))))).....)))...)))))......
SJC_S015330_46943	46943	-42.3	-2.2	907	907	gaaagauaugaacauaaagauugugaacauucggguuuuaauccuaaaaacacuaaauucugaucagaugucauuaaaauaguaauggauacauauacaaaaaaaccgu	109	27.5229	.......((((.(((...(((((.((..(((.(((((((.......))))).)).))))))))))..))))))).......((((((....))).)))...........
SJC_S010921_45763	45763	-6.9	-2.2	932	906	agacccacuguacagauuaguuacaucgucgucaugcaucgaaacuuuauuccauaaaguaugaaucucguguauuaaucaauaaaauaaugguggcucacacuagcauau	111	35.1351	.((.(((((((...(((((((.(((.((...((((((((.(((......))).))...))))))....)))))))))))).........))))))).))............
SJC_S000013_13514	13514	-40.2	-2.2	253	248	uugauugauugauugacuugaaagcacaauuucugaauccuauuuuuugauuguuucagaacauacacuguuaaacuguaauuaccucacauucaguaaauaugauau	108	27.7778	((((.(((.((((((..((((.((......(((((((....(((....)))...)))))))......)).))))....))))))..)))...))))............
SJC_S000659_18709	18709	-15.1	-2.2	12173	12173	gaacaaauacuaauaaccagcauuaucuacuacugaaggacacguuucacaaucuuaaaguaaaacagaguggaauguugugaaguauacuuaaccccucguugacag	108	36.1111	......(((((......((((((..((((((.(((....((..................))....)))))))))))))))...)))))..(((((.....)))))...
SJC_S000265_8045	8045	-0.2	-2.2	87	87	auuuugaccaucguugucuucgaaauauugcucgcaucgucgaguaguaggaucgucgaguaaguaauugcgggguuagacgacggguguuaggcaaaggugauaauc	108	45.3704	..(((((((.((((((((((((....((((((.((.(((.(((.........))).))))).))))))..)))....)))))))))).))))))..............
SJC_S000654_16582	16582	-21.4	-2.2	23	23	cucuaugacaaugcaaguugguugaagaacagugagacugaaauaccaaaagagaacuacuuaauaaaugguuacagcaaacuccuguagaaguuauucauuaagcaa	108	34.2593	...........(((....(((.(((...((((.(((..((....((((...(((.....)))......)))).....))..))))))).....))).)))....))).
SJC_S016395_46442	46442	-30.4	-2.2	150	150	uaauaaguaguuaaaacugauaacuaacacuuuauaguuauuguaugaaaucauuaacaauccaguauuuagucaauguaaguagugugaaaauaucaaccuuuaaug	108	24.0741	.........((((((..(((((....(((((.......(((((..((((..................))))..))))).....))))).....)))))...)))))).
SJC_S000148_9704	9704	-7.8	-2.2	7	7	aauuucgcuucucccgugaauauguaccaauucaacugauauuguggagccgguuuaauuggauguaagaaucggaaaucccauuacagaauuuucgaaaaucaccca	108	37.963	...(((((.......)))))(((((.((((((.(((((............))))).)))))))))))....(((((((((........).))))))))..........
SJC_S000591_16158	16158	-2.4	-2.2	3371	3371	ugcuucuucuacgguucaaagucaucgugagcuuccaacuuugagacuguugagcacacagugauaagcuggaggugugagggucugaauuacaagucugccgacagu	108	47.2222	............((((((.(.((.(((...(((((((.(((....(((((.......)))))...))).))))))).))))).).))))))....(((....)))...
SJC_S000591_16157	16157	-1.8	-2.2	3371	3371	ugagcacacagugauaagcuggaggugugagggucugaauuacaagucugccgacaguaagcuuaguaugaauucgcaauuuuuaaaagccacugugcaucucuuguu	108	42.5926	.(((..(((((((....((((((((((((((...((((.((((..(((....))).))))..))))......))))).))))))...))))))))))...))).....
SJC_S000315_9222	9222	-44.5	-2.2	35	35	uaaugacauaauacuuguuuaacuaaggaauuauaugcuaacaaucagacaggccaccguaacacuuuauuaauagacaaacuagauaaugaaaucuaaauguaucua	108	27.7778	..............(((((((..(((((..((((..(((............)))....))))..)))))....)))))))..(((((......)))))..........
SJC_S002404_30911	30911	-14.6	-2.2	17	16	gggggaauuauauucagcuggaagguacuuuggaauucuagguguucagggauacauuaguagagaacgcuuauuaauauaugcgaucaguucaaguaaaagaauguc	108	37.037	.........((((((((((((...(((..((((.....(((((((((.....(((....)))..)))))))))))))..)))....)))))).........)))))).
SJC_S001150_18934	18934	-15.1	-2.2	303	303	uucucuugaucugcuaaauaaaguuugugugcaaccuuuacuagaauacugcgaccuuuauucucaguaauagucauaugcuaguguucuuuuuuuucaacccauuuaug	110	32.7273	..................(((((.(((....))).)))))..(((((((((((((..(((((...)))))..)))....)).))))))))....................
SJC_S000413_12977	12977	-22.1	-2.2	74	74	uaucauauucuauagugauucaacugucuuuaguucuaauuuuuuuuguuacaagauauaaacaguacuaagcuaacuacaguaaguuauuagacgucuacauuaucucc	110	27.2727	............((((((((..(((((..((((((...(((.(((.((((....)))).))).)))....))))))..))))).))))))))..................
SJC_S015815_44650	44650	-41.6	-2.2	132	129	aucuucacguuaaauaugaacugaauagacaagacucaucuuaguaaacaacuacauagauaaacaaauuuuacaucauauuacuacaacagugagaaauuuuaguac	108	26.8519	...((((((((.(((((((..((((............((((..(((......)))..))))........))))..))))))).....))).)))))............
SJC_S000088_5698	5698	-7.5	-2.2	24012	24012	guugucugauucacaacgacucgugauaucaguauauuuauacaguuuaauuauuauuuaugaauugaguaugaaugaugacuaaaugauaauacuuacuuacgccug	108	28.7037	((((((((((((((........)))).))))((((....)))).(((((.((((((((((((.......)))))))))))).)))))))))))...............
SJC_S004503_42103	42103	-5.9	1.6	47	47	auacaauauuaucaaucaaguccuuauugauauuauuuaauguaaaauguuaaucauaaucaguuuucacauugaauaucuauuaauuugcugacuucauugcugaca	108	23.1481	........(((.((((.((((((..(((((((.(((((((((((((((((((....))))..))))).))))))))))..)))))))..)..))))).)))).)))..
SJC_S002605_35730	35730	-2.2	1.6	3363	3363	auacgguauaauagaaguaauuaauaguuuucugacgacuuguuguuauuccuuuggguugugggaauaauaaucaaggucgauacucuauuaauuuagaagcacucgauc	111	32.4324	..................(((((((((...((.(((..(((((((((((((((.........))))))))))).)))))))))....)))))))))...............
SJC_S000649_26800	26800	0.3	1.6	1938	1938	acaauauugugaucacuacauuggaauugccucuguguaugcacaguacauagcggcaaguugauuuacugguaucacaauuuaguguguaucguuagaaugcuuuagua	110	36.3636	(((..((((((((.((((...(.((.(((((.((((((((.....)))))))).))))).)).).....))))))))))))....)))(((((....).)))).......
SJC_S000223_10878	10878	-22.9	-2.2	122	122	uugaagauauugaaacaaugauaagcuauaauguucuaucuuuauauaccaauucuaauugauauacgucuagaauguauuaauggagugcuuguaaaugaucauaca	108	25.9259	.................(((((....(((((.((....(((....((((..((((((...(((....)))))))))))))....)))..)))))))....)))))...
SJC_S001006_29331	29331	-13.3	-2.2	92	92	auucgcguuaaagauuguuggcuuuagauuuuccucccuguaugucguaagugugccgcuuaauuuuaguauacuuaacuaaaacaaucaugauaauugagucaaauc	108	33.3333	.................(((((((..((((.((.....(((......(((((((((............)))))))))......))).....)).)))))))))))...
SJC_S022126_47353	47353	-30.9	-2.2	20	20	uaguccuagaaagauagcuugagaugauguugaguuccagauugaagaauuuaguagguaauaagcagcuauuauaaaauuuugaagagagucacaaaauaaaaacacu	109	30.2752	............(((((((....((..((((((((((.........))))))))))....))....))))))).....((((((..........)))))).........
SJC_S000866_33556	33556	-2.7	-2.2	48	48	cgugggcuaauaauguacgaaauauauuccguugauuguggcgauuuuuuucugcuuuuaaagaggcuuucgcuauacucuuugaaauguagucugcugcagugguaa	108	37.963	.....((((.....(((.((..((((((.((..((.((((((((....(((((........)))))...)))))))).))..)).)))))).))))).....))))..
SJC_S002410_40198	40198	-2.3	-2.2	1398	813	cuaauucuugaccuugcaucuuuuggcaguuagcugaguuaauauuuucaacauguuaguuuuaagcgagcgugcgaccgaguugcugcaggugcuuauaauuggaaacc	110	40.9091	((((((..((((((((((.(.(((((..((..(((...((((.(((..((...))..))).))))...)))..))..)))))..).)))))).).))).)))))).....
SJC_S026310_40091	40091	-24.6	-2.2	14	14	ucauaguucacacuuacacagaaaauauuaacucaggaacuguuucuaacaggagcaagccuuuuaauguuuauaguuaguacuuuuuuucagauacauuagucgaua	108	30.5556	...........(((.((.....(((((((((...(((...(((((((...)))))))..))).)))))))))...)).)))...........(((......)))....
SJC_S000232_7215	7215	-16.9	-2.2	146	146	cauucucuaggauuuucaugaagguuuuauuuuauuaaaaaacuauuuuuggucaaguuuuuuuguuuuucaauaugaugauuggcuacugaaaacaguuuagaagag	108	25.9259	...((((((((.((((((.(.((.(.(((((.((((.((((((.....................)))))).)))).)))))..).)).)))))))...))))).))).
SJC_S002031_35912	35912	-6	1.6	21	21	cguguauuauacgucucgugguuagugaugauauuuaauucacuuguguuauggcuaauaaacucuccacugucuuauaaguuuaauuaacguauuauucaguaacuaa	109	30.2752	(((((...))))).....((((((.(((((((((((((((.(((((((..((((...............))))..)))))))..)))))).)))))).))).)))))).
SJC_S000232_7216	7216	-21	-2.2	146	146	ggucaaguuuuuuuguuuuucaauaugaugauuggcuacugaaaacaguuuagaagaguuauucaagaacuccauuagauuaacuucgaugugauuuauucuguaaug	108	29.6296	(((((((((...(((.....)))...)))..)))))).......((((..((((.(((((.......)))))((((.((......))))))...))))..))))....
SJC_S000658_14006	14006	-15.1	-2.2	1405	1405	auauuguugugugguguucuuugccuucgucuauguauggaauuaauaacugcaacuugcuaaccugugaacuuaucuacuauaucgagugauccaacgacacaccaac	109	38.5321	...........((((((((.(((..((..((.(((((((((.......((................)).......)))).))))).))..))..))).)).))))))..
SJC_S002713_34684	34684	-11.6	-2.2	44	41	ucaacuucuuuugguuucauuaucaaccaauaaaauauuguacuuaaauuucaguugauugaauucaucacagauuaauguugguuggauaauauugaaaacuaugguc	109	26.6055	...........(((((((((((((((((((((.....((((........((((......))))......)))).....)))))))).)))))...)).)))))).....
SJC_S008002_41212	41212	-1.5	-2.2	767	767	caaugucacuuuuuaaaugcacaugauggauguaguguuggugagaacaacugaagagaaugugauguugauuguguguauuguuuagguggagaguugaccacauac	108	37.963	((((.((((((....((((((((((((.(((((...((((.......)))).............))))).))))))))))))....))))))...)))).........
SJC_S000802_17229	17229	-30.4	-2.2	99	98	uuaaacacauuaucaacuuuacuaaaguuauguauuauugaaauuauuccaguggcauuuauaauuucguuauuuuguaacuaaauguauuuuaggaacuaccccagu	108	25	...................(((...(((((((...((.(((((((((.............))))))))).))...)))))))....))).....((......))....
SJC_S000176_12278	12278	-4	-2.2	1543	1543	ugucuucaaagcguugcucguguuugcugggacaaccgauuaagcaauauaucgguuagaaauaaaguaccaggcaaguaugauaaauuaaucgauaaauauauauuuauc	111	33.3333	.................(((((((((((.(((((((((((..........))))))).........)).)).)))))))))))..........(((((((....)))))))
SJC_S000708_15068	15068	0.1	1.6	30	28	guaguugaaugaagaucguuauucuuguggagacugguauucuaaaugaugcgcaccaaucuguggcauauucgauuaauuaaaaauaccaaucucuacaaaaauagccau	111	34.2342	.................((((((.(((((((((.(((((((.......((((.(((......)))))))...............))))))).))))))))).))))))...
SJC_S000069_6944	6944	-5.2	-2.2	4905	4357	cucugugggcguggguucgaaucccacuccugacaccaaacuuaugcacacgaacuugcacacaggucaccucugcauuucaacacacacauacacaacgacaacaac	108	50	...((((((.(((((.......))))).))).)))........(((((.....(((((....)))))......)))))..............................
SJC_S000069_6942	6942	-8.6	-2.2	4913	4365	cucugugggcguggguucgaaucccacuccugacaccagacuuaugcacacgaacuugcacacacgucaccucuacauuugaacacacacauacacaaugacaacaac	108	49.0741	...((((((.(((((.......))))).))).)))...(((...((((........)))).....)))........................................
SJC_S016027_44348	44348	-11.4	-2.2	9988	9987	aggagaguauagauguaaagcugaaacuuaaaggaaucgaugaaagggcaccccccacccaggaauggagccugugguuuaauuaaacuuggcaaaugaaagcucaca	108	43.5185	....((((.((..(((.(((...(((((...(((..((.((....(((.........)))....)).)).)))..))))).......))).)))..))...))))...
SJC_S000011_3548	3548	-6.9	-2.2	65	65	cuaucaaagcuuuacacaggcuaaauuagauuuaauuuuuaggaaaaagaugugacuauuaauuguacuaaaugugugucuguguguaguaaaugcaauuccuuccuc	108	30.5556	........(((.(((((((((..(.((((...(((((..(((.............)))..)))))..))))...)..))))))))).)))..................
SJC_S009021_36547	36547	-2.7	-2.2	1244	1242	aaggaaaauucuuuacacacccaaggaguugcucuggugcugucuacgaaagcucgcaacgcacuuguagggugggaacaacauggaucuaggaucaucaaagcaucuuu	110	45.4545	(((((....)))))...(((((.(.((((.((..(((.(((.........))).).))..)))))).).)))))...........((((...))))..............
SJC_S003585_34005	34005	-31.5	-2.2	20	20	auguuuucuuuagacaauaaugcauggaauguaaauuauucuuaccaauacauuuacuacaaaaaugccauauuuaguagcaaaacauauucuuauacauaaaaauuu	108	22.2222	(((((((((......((((..((((.....((((((((((......)))).)))))).......))))..))))....)).)))))))....................
SJC_S003585_34005	34005	-31.5	-2.2	20	20	auguuuucuuuagacaauaaugcauggaauguaaauuauucuuaccaauacauuuacuacaaaaaugccauauuuaguagcaaaacauauucuuauacauaaaaauuu	108	22.2222	(((((((((......((((..((((.....((((((((((......)))).)))))).......))))..))))....)).)))))))....................
SJC_S000250_5598	5598	-16	-2.2	946	945	ugugaauaaauacauuauuuagacuucauuucuuuuguuuuugguuuaaauaagcccuguuggaaaaccugucuaguuguaucuucaucacccagugucugaacguuugg	110	33.6364	.(((((...(((((....((((((....(((((.........(((((....))))).....)))))....)))))).))))).)))))...((((.((....))..))))
SJC_S014490_42111	42111	-22.5	-2.2	272	272	uaguuaauuuucauaucuacucugguucuuuugaacaucuuccugauuuauuuacucgaaacuuaugauguuugacuggugaauuaucaagcuaaagaauagugaucu	108	29.6296	..........(((...(((.(((.((((....)))).......((((..(((((((..((((.......))))....))))))).))))......))).))))))...
SJC_S000024_2033	2033	-32	-2.2	9847	9847	uuuuaacuuuucacuauauuugaaauuauuacguaacuaguaauuaacaagugaauaauuugaagucuuuguuaaaaauucugaugauaguaagugacgccuaaguga	108	25	..........(((((..........(((((((((....(((..((((((((.((...........))))))))))..)))...))).))))))..........)))))
SJC_S000836_8105	8105	-13.3	-2.2	119	115	auaaauauacuuaauucaaaguacauuacauuucaugucuauaugauauguugauauaauaguugacaguugauaugaugauuacugaaauaaauugagauaaugauga	109	22.0183	.....(((.(((((((...((((.(((((((.(((((((..(((.((((....)))).)))...))))..))).))).))))))))......)))))))))).......
SJC_S000836_8106	8106	-13.8	-2.2	138	115	uugauauaauaguugacaguugauaugaugauuacugaaauaaauugagauaaugaugaugaugauguugauguaagauagaaguucauuucuauguuaaauguauugu	109	24.7706	..((((((...(((((((.....(((.((.((((((.((.....)).)).)))).)).)))....))))))).(((.((((((......)))))).)))..))))))..
SJC_S027751_46535	46535	-22.9	-2.2	108	107	ucaauuuuuaaaaaaaaagacaauuaguuguuuuuaagaaaaauaauguauuuccuaacauauuacugacuuaugaaaauuuuucugagaaacggcaccuaacguauug	109	23.8532	..........................(((((((((.((((((((...(((..((.............))..)))....)))))))).))))))))).............
SJC_S004935_41721	41721	-0.2	-2.2	2461	1938	cuauuguaaugggacguucauacauaguuuuuaauuugaggcugcacgugacaauauugugaucacuacauuggaauugccucuguguaugcacgguacauggcgguaag	110	40.9091	.((((((.(((...(((.(((((((((....((((((.((.......((((((......)).))))....)).))))))...))))))))).)))...))).))))))..
SJC_S000668_22806	22806	-4.1	-2.2	45	44	uaaaaguugauaugaaugaauuacuagaagugguuauccgcgauguauucgauauugaaguaguacguuguaucucaguauuuucagugauuucuuuuauucauuuga	108	29.6296	.......(((.(((((.((((((((.((((((.(.....(((((((((((.........).)))))))))).....).)))))).))))))))..)))))))).....

## Sheet: Sheet2
The correspondence between precursor miRNAs and predicted miRNAs
predicted miRNA	precursor miRNA
SJC_S000996_20012_star@@sma-miR-8440-3p	SJC_S000996_20012
SJC_S006036_37578_mature@@sma-miR-8414-5p	SJC_S006036_37578
SJC_S000587_13351_star@@bta-miR-2353	SJC_S000587_13351
SJC_S000400_19068_mature@@sma-miR-8453-5p	SJC_S000400_19068
SJC_S000361_21508_mature@@sma-miR-8407-3p	SJC_S000361_21508
SJC_S000038_15779_mature@@rno-let-7f-2-3p	SJC_S000038_15779
SJC_S000127_16029_star@@ssc-miR-374a-3p	SJC_S000127_16029
SJC_S000310_25277_mature@@sma-miR-71b-3p	SJC_S000310_25277
SJC_S000310_25278_mature@@sma-miR-71b-3p	SJC_S000310_25278
SJC_S000218_13093_mature@@sma-miR-8462-3p	SJC_S000218_13093
SJC_S000729_25440_star@@sma-miR-8449-5p	SJC_S000729_25440
SJC_S000729_25439_star@@sma-miR-8460-5p	SJC_S000729_25439
SJC_S000428_27179_mature@@rno-miR-489-3p	SJC_S000428_27179
SJC_S000429_14174_mature@@ssc-miR-98	SJC_S000429_14174
SJC_S000429_14173_mature@@ssc-miR-98	SJC_S000429_14173
SJC_S001033_16528_mature@@hsa-miR-609	SJC_S001033_16528
SJC_S000690_19213_star@@ssc-miR-30b-3p	SJC_S000690_19213
SJC_S000900_14705_mature@@sma-miR-8403-5p	SJC_S000900_14705
SJC_S000083_4029_mature@@sma-miR-8480-5p	SJC_S000083_4029
SJC_S001656_33149_mature@@hsa-miR-5087	SJC_S001656_33149
SJC_S000368_16699_star@@sma-miR-2e-5p	SJC_S000368_16699
SJC_S000136_11873_star@@sma-miR-8474-5p	SJC_S000136_11873
SJC_S002121_37253_star@@hsa-miR-6866-3p	SJC_S002121_37253
SJC_S000059_1898_star@@sma-miR-8445-3p	SJC_S000059_1898
SJC_S000045_2359_star@@ssc-miR-421-5p	SJC_S000045_2359
SJC_S000254_14120_mature@@ssc-miR-487b	SJC_S000254_14120
SJC_S000061_3822_mature@@sma-miR-8414-3p	SJC_S000061_3822
SJC_S001159_23624_mature@@ssc-miR-34a	SJC_S001159_23624
SJC_S001294_18900_mature@@bta-miR-449b	SJC_S001294_18900
SJC_S027210_41852_mature@@mmu-miR-30f	SJC_S027210_41852
SJC_S000207_11841_star@@sma-miR-8431-3p	SJC_S000207_11841
SJC_S005867_39540_star@@bta-miR-7858	SJC_S005867_39540
SJC_S027444_42441_star@@ssc-miR-374a-3p	SJC_S027444_42441
SJC_S000031_504_star@@sma-miR-755-3p	SJC_S000031_504
SJC_S000427_25203_star@@bta-miR-2284b	SJC_S000427_25203
SJC_S000208_6255_star@@sma-miR-8444-5p	SJC_S000208_6255
SJC_S000033_2878_star@@sma-miR-8482-5p	SJC_S000033_2878
SJC_S008431_38534_mature@@sma-miR-8479-5p	SJC_S008431_38534
SJC_S000109_5262_star@@sma-miR-8412-3p	SJC_S000109_5262
SJC_S001712_29112_star@@bta-miR-1814a	SJC_S001712_29112
SJC_S000823_13908_star@@hsa-miR-548ab	SJC_S000823_13908
SJC_S000484_10680_star@@sma-miR-7-3p	SJC_S000484_10680
SJC_S000484_10680_star@@sma-miR-7-3p	SJC_S000484_10680
SJC_S005013_35628_mature@@sma-miR-7-5p	SJC_S005013_35628
SJC_S005013_35627_star@@sma-miR-7-3p	SJC_S005013_35627
SJC_S005013_35627_star@@sma-miR-7-3p	SJC_S005013_35627
SJC_S000484_10690_mature@@mmu-miR-5626-3p	SJC_S000484_10690
SJC_S024075_47417_mature@@bta-miR-2478	SJC_S024075_47417
SJC_S000162_8913_star@@ssc-miR-378	SJC_S000162_8913
SJC_S011080_46224_star@@hsa-miR-584-5p	SJC_S011080_46224
SJC_S003818_36920_mature@@sma-miR-8449-5p	SJC_S003818_36920
SJC_S000809_10483_mature@@rno-let-7f-2-3p	SJC_S000809_10483
SJC_S002541_36365_mature@@bta-miR-2284p	SJC_S002541_36365
SJC_S002541_36363_star@@sma-miR-8473-5p	SJC_S002541_36363
SJC_S002541_36363_star@@sma-miR-8473-5p	SJC_S002541_36363
SJC_S003818_36919_mature@@sma-miR-8449-5p	SJC_S003818_36919
SJC_S000023_4100_star@@rno-miR-880-3p	SJC_S000023_4100
SJC_S000315_9203_mature@@sma-miR-8423-3p	SJC_S000315_9203
SJC_S000122_9478_mature@@mmu-miR-190b-3p	SJC_S000122_9478
SJC_S000383_5932_star@@sma-miR-8424-5p	SJC_S000383_5932
SJC_S001313_30555_mature@@sma-miR-8474-5p	SJC_S001313_30555
SJC_S000172_7087_mature@@sma-miR-8479-5p	SJC_S000172_7087
SJC_S000351_33128_star@@sma-miR-745-3p	SJC_S000351_33128
SJC_S003541_38664_star@@mmu-miR-7076-3p	SJC_S003541_38664
SJC_S000170_15586_mature@@sma-miR-8434-5p	SJC_S000170_15586
SJC_S000395_16293_mature@@ssc-miR-22-3p	SJC_S000395_16293
SJC_S000423_13736_mature@@bta-miR-2284p	SJC_S000423_13736
SJC_S000685_18332_star@@sma-miR-8454-3p	SJC_S000685_18332
SJC_S004484_30279_star@@sma-miR-281-5p	SJC_S004484_30279
SJC_S004484_30279_star@@sma-miR-281-5p	SJC_S004484_30279
SJC_S000624_20570_mature@@sma-miR-8435-5p	SJC_S000624_20570
SJC_S011863_43992_mature@@ssc-miR-137	SJC_S011863_43992
SJC_S000192_2978_star@@sma-miR-3479-3p	SJC_S000192_2978
SJC_S001393_30521_star@@sma-miR-8437-3p	SJC_S001393_30521
SJC_S001004_23121_star@@mmu-miR-7243-3p	SJC_S001004_23121
SJC_S000114_2430_mature@@bta-miR-2895	SJC_S000114_2430
SJC_S005195_40262_star@@sma-miR-8437-3p	SJC_S005195_40262
SJC_S005195_40262_star@@sma-miR-8437-3p	SJC_S005195_40262
SJC_S015330_46943_mature@@bta-miR-2285n	SJC_S015330_46943
SJC_S010921_45763_mature@@rno-miR-598-3p	SJC_S010921_45763
SJC_S000013_13514_mature@@hsa-miR-548g-3p	SJC_S000013_13514
SJC_S000659_18709_mature@@sma-miR-1b-3p	SJC_S000659_18709
SJC_S000265_8045_star@@hsa-miR-548as-5p	SJC_S000265_8045
SJC_S000654_16582_mature@@hsa-miR-1178-3p	SJC_S000654_16582
SJC_S016395_46442_star@@bta-miR-2351	SJC_S016395_46442
SJC_S000148_9704_star@@sma-miR-8443-3p	SJC_S000148_9704
SJC_S000591_16158_mature@@hsa-miR-3652	SJC_S000591_16158
SJC_S000591_16157_mature@@hsa-miR-3652	SJC_S000591_16157
SJC_S000315_9222_mature@@sma-miR-8418-3p	SJC_S000315_9222
SJC_S002404_30911_star@@sma-miR-96-5p	SJC_S002404_30911
SJC_S001150_18934_star@@sma-miR-8441-5p	SJC_S001150_18934
SJC_S000413_12977_mature@@sma-miR-8408-3p	SJC_S000413_12977
SJC_S015815_44650_mature@@bta-miR-6122-3p	SJC_S015815_44650
SJC_S000088_5698_mature@@bta-miR-1434-5p	SJC_S000088_5698
SJC_S004503_42103_mature@@sma-miR-8414-5p	SJC_S004503_42103
SJC_S002605_35730_mature@@ssc-miR-9861-5p	SJC_S002605_35730
SJC_S000649_26800_mature@@rno-miR-6216	SJC_S000649_26800
SJC_S000223_10878_mature@@sma-miR-8468-5p	SJC_S000223_10878
SJC_S001006_29331_star@@sma-miR-8414-3p	SJC_S001006_29331
SJC_S022126_47353_star@@hsa-miR-4774-5p	SJC_S022126_47353
SJC_S000866_33556_star@@bta-miR-2427	SJC_S000866_33556
SJC_S002410_40198_star@@sma-miR-8443-3p	SJC_S002410_40198
SJC_S026310_40091_mature@@sma-miR-8464-5p	SJC_S026310_40091
SJC_S000232_7215_mature@@sma-miR-8447-5p	SJC_S000232_7215
SJC_S002031_35912_star@@sma-miR-8459-3p	SJC_S002031_35912
SJC_S000232_7216_mature@@sma-miR-8447-5p	SJC_S000232_7216
SJC_S000658_14006_star@@mmu-miR-6239	SJC_S000658_14006
SJC_S002713_34684_mature@@sma-miR-8422-3p	SJC_S002713_34684
SJC_S008002_41212_star@@mmu-miR-7226-5p	SJC_S008002_41212
SJC_S000802_17229_star@@sma-miR-8409-5p	SJC_S000802_17229
SJC_S000176_12278_star@@sma-miR-745-5p	SJC_S000176_12278
SJC_S000708_15068_star@@hsa-miR-3129-5p	SJC_S000708_15068
SJC_S000069_6944_mature@@bta-miR-2478	SJC_S000069_6944
SJC_S000069_6942_mature@@bta-miR-2478	SJC_S000069_6942
SJC_S016027_44348_mature@@sma-miR-8480-5p	SJC_S016027_44348
SJC_S000011_3548_mature@@mmu-miR-3082-5p	SJC_S000011_3548
SJC_S009021_36547_mature@@sma-miR-281-3p	SJC_S009021_36547
SJC_S003585_34005_star@@mmu-miR-5619-5p	SJC_S003585_34005
SJC_S003585_34005_star@@mmu-miR-5619-5p	SJC_S003585_34005
SJC_S000250_5598_star@@sma-miR-8468-5p	SJC_S000250_5598
SJC_S014490_42111_mature@@sma-miR-8458-3p	SJC_S014490_42111
SJC_S000024_2033_mature@@sma-miR-8442-3p	SJC_S000024_2033
SJC_S000836_8105_star@@sma-miR-8404-3p	SJC_S000836_8105
SJC_S000836_8106_star@@bta-miR-2335	SJC_S000836_8106
SJC_S027751_46535_star@@sma-miR-8468-5p	SJC_S027751_46535
SJC_S004935_41721_mature@@rno-miR-6216	SJC_S004935_41721
SJC_S000668_22806_star@@mmu-miR-875-3p	SJC_S000668_22806
