# Supplementary material for: Comparative analysis of microRNA expression profiles of adult Schistosoma japonicum isolated from water buffalo and yellow cattle
Source: Parasit Vectors. 2019 May 2;12:196. doi: 10.1186/s13071-019-3450-7 (PMC6498558; doi:10.1186/s13071-019-3450-7)
Supplement: Supplementary file 11 — Additional file 11: Table S10. Primary analysis of the identified differentially expressed novel miRNAs (water buffalo/yellow cattle). [file 13071_2019_3450_MOESM11_ESM.xls]

## Sheet: Sheet1
Table S10. Primary analysis of the identified differentially expressed novel miRNAs (water buffalo / yellow cattle)
Novel miRNA name	Location at genome	Example miRBase miRNA With the same seed	Expression style	Size (nt)	G +C(%)	MFE(kcal/mol)
SJC_S000428_27179_mature@@rno-miR-489-3p	SJC_S000428:27179	rno-miR-489-3p: augacaucacauauauggcagc	up	19	0.368421	-23.3
SJC_S000996_20012_star@@sma-miR-8440-3p	SJC_S000996:20012	sma-miR-8440-3p: guucguuucugaguaaggu	up	19	0.315789	-26.9
SJC_S002031_35912_star@@sma-miR-8459-3p	SJC_S002031:35912	sma-miR-8459-3p: uuggaauaauacguguauu	up	22	0.227273	-6
SJC_S016027_44348_mature@@sma-miR-8480-5p	SJC_S016027:44348	sma-miR-8480-5p: acuaauuuccuuuaaguaa	down	20	0.3	-11.4
SJC_S027751_46535_star@@sma-miR-8468-5p	SJC_S027751:46535	sma-miR-8468-5p: uauccaauaauguauuaauau	down	17	0.117647	-22.9
	Info: SJC_S027751 are genome sequence name and the number after the ":" is the position of the start of the miRNA
